# Supplementary material for: Association of circulating SLAMF7+Tfh1 cells with IgG4 levels in patients with IgG4-related disease
Source: Springer Nature journal article supplement (doi:10.1186/s12865-020-00361-0), 2020-06-01

Figure S1

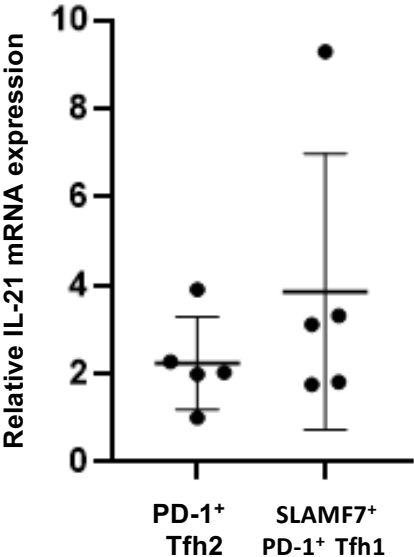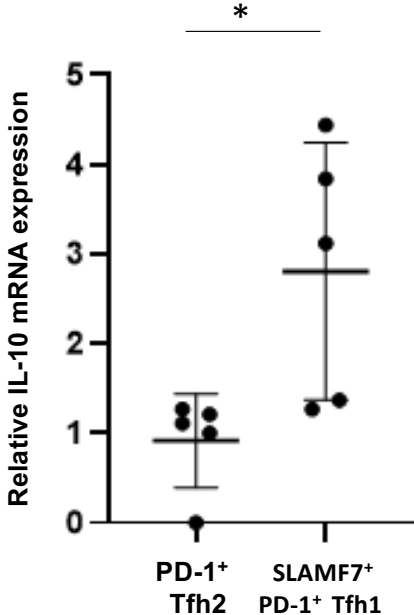

Supplement: MOESM1 [file 18041980]
