# Supplementary material for: Association of circulating SLAMF7+Tfh1 cells with IgG4 levels in patients with IgG4-related disease
Source: Springer Nature journal article supplement (doi:10.1186/s12865-020-00361-0), 2020-06-01
Supplement: MOESM3 [file 18041980]

Table S1

|                                    | Patients with IgG4-RD | Healthy controls |
|------------------------------------|-----------------------|------------------|
| Male, n (%)                        | 15 (71)               | 6 (60)           |
| Age (years), average (SD)          | 66 (12.4)             | 52 (10.9)        |
| Serum IgG4 (mg/dl), average (SD)   | 372 (336)             | 37 (21)          |
| Serum IgG (mg/dl), average (SD)    | 1645 (545)            |                  |
| CRP (mg/dl), average (SD)          | 0.3 (0.67)            |                  |
| Hypocomplement, n (%)              | 3 (14)                |                  |
| Untreated patients, n (%)          | 13 (62)               |                  |
| Drug usage, (n)                    | PSL (8)               |                  |
| Dose of PSL (mg/day), average (SD) | 6.05 (2.83)           |                  |
| SS-A positive, n (%)               | 0 (0)                 |                  |
| Organs involved                    |                       |                  |
| Salivary gland, n (%)              | 17 (81.0)             |                  |
| Lymph node, n (%)                  | 7 (33.3)              |                  |
| Pancreas, n (%)                    | 6 (28.6)              |                  |
| Peritoneum, n (%)                  | 6 (28.6)              |                  |
| Lung, n (%)                        | 5 (23.8)              |                  |
| Lacrimal gland, n (%)              | 4 (19.0)              |                  |
| Prostate, n (%)                    | 3 (14.3)              |                  |
| Aorta, n (%)                       | 3 (14.3)              |                  |
| Kidney, n (%)                      | 3 (14.3)              |                  |
| Thyroid, n (%)                     | 1 (4.8)               |                  |
